# Supplementary material for: Engineering thermoelectric and mechanical properties by nanoporosity in calcium cobaltate films from reactions of Ca(OH)2/Co3O4 multilayers
Source: Royal Society of Chemistry journal article supplement (doi:10.1039/d2na00278g), 2022-01-01
Supplement: d2na00278g1.pdf [file d2na00278g1.pdf]

## Supplementary information

# Engineering thermoelectric and mechanical properties by nanoporosity in calcium cobaltate films from reactions of $\text{Ca}(\text{OH})_2/\text{Co}_3\text{O}_4$ multilayers

*Binbin Xin<sup>a\*</sup>, Erik Ekström<sup>a</sup>, Yueh-Ting Shih<sup>b</sup>, Liping Huang<sup>b</sup>, Jun Lu<sup>a</sup>, Anna Elsukova<sup>a</sup>, Yun Zhang<sup>c</sup>, Wenkai Zhu<sup>c</sup>, Theodorian Borca-Tasciuc<sup>c</sup>, Ganpati Ramanath<sup>a,b</sup>, Arnaud Le Febvrier<sup>a</sup>, Biplab Paul<sup>a</sup> and Per Eklund<sup>a\*</sup>*

*<sup>a</sup>Thin Film Physics Division, Department of Physics, Chemistry and Biology (IFM), Linköping University, SE-58183 Linköping, Sweden*

*<sup>b</sup>Department of Materials Science and Engineering, Rensselaer Polytechnic Institute, Troy, New York 12180, USA*

*<sup>c</sup>Rensselaer Polytechnic Institute, Department of Mechanical, Aerospace, and Nuclear Engineering, Troy, NY 12180, USA.*

\*E-mail: [binbin.xin@liu.se](mailto:binbin.xin@liu.se); [per.eklund@liu.se](mailto:per.eklund@liu.se)

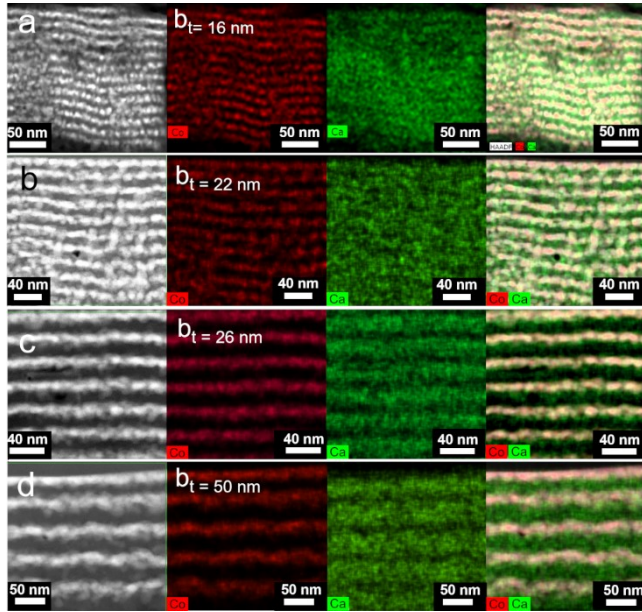

Figure S1. STEM image and EDX spectral maps of Co and Ca from as-deposited CaO/Co<sub>3</sub>O<sub>4</sub> multilayer films with different Ca(OH)<sub>2</sub>/Co<sub>3</sub>O<sub>4</sub> bilayer thickness  $b_t$  formed after air-exposure for one month: (a)  $b_t = 15$  nm, (b)  $b_t = 22$  nm, (c)  $b_t = 26$  nm, and (d)  $b_t = 50$  nm.

STEM images indicate increasing interface roughness with increasing of  $b_t$ . The EDX spectral maps for  $b_t = 16$  nm and 22 nm indicate distinct alternating Co-containing layers corresponding to Co<sub>3</sub>O<sub>4</sub>. In contrast, the Ca is distributed uniformly across the multilayers (Fig. S1a and 1b), indicating Ca diffusion. EDX spectral maps for higher  $b_t$  show distinct layers of Co and Ca (Fig. S1c and 1d), but with a greater interface waviness.

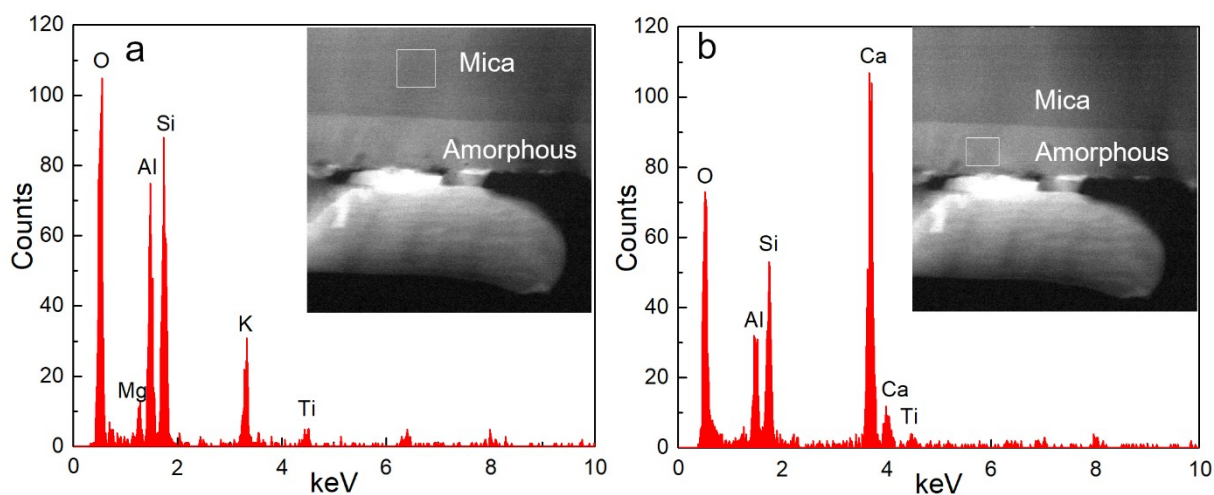

Figure S2. EDX spectra from (a) the mica substrate and (b) the interfacial amorphous layer formed during  $\text{Ca}_3\text{Co}_4\text{O}_9$  thin film synthesis by annealing multilayers of  $\text{Ca}(\text{OH})_2/\text{Co}_3\text{O}_4$  specified by characteristic  $\text{Ca}(\text{OH})_2/\text{Co}_3\text{O}_4$  bilayer thickness  $b_t = 26$  nm. Insets show the STEM images.

EDX spectra from mica shows O, Mg, Al, Si, and K (Fig. S2a). EDX spectra from the amorphous glass layer shows O, Al, Si, and Ca (Fig. S2b), suggesting that the interfacial amorphous layer is formed by the diffusion of Ca into, and reaction with, the mica substrate.

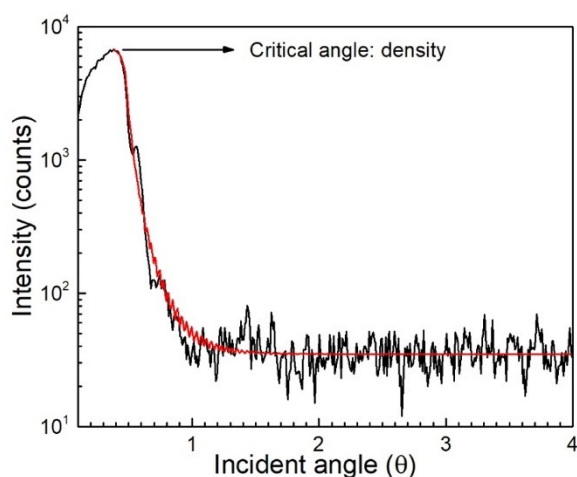

Figure S3. X-ray reflectivity (XRR) of  $\text{Ca}_3\text{Co}_4\text{O}_9$  films on sapphire as a function of incidence angle.

Simulations (red) overlaid on the measured data revealed the film density (relative to the total external reflection angle) to be  $\sim 3 \text{ g cm}^{-3}$ .
